1 **Threonine phosphorylation regulates the molecular assembly and**  
2 **signaling of EGFR in cooperation with membrane lipids**

3  
4  
5 Ryo Maeda<sup>1</sup>, Hiroko Tamagaki-Asahina<sup>2</sup>, Takeshi Sato<sup>2</sup>, Masataka Yanagawa<sup>1</sup>, and  
6 Yasushi Sako<sup>1,3,\*</sup>

7  
8 <sup>1</sup>Cellular Informatics Laboratory, RIKEN CPR, Wako, Saitama 351-0198, Japan; <sup>2</sup>Kyoto  
9 Pharmaceutical University, 5, Misasagi-cho, Yamashina, Kyoto, 607-8414, Japan;

10 <sup>3</sup>CREST JST, 4-1-8, Honcho, Kawaguchi, 332-0012, Japan

11  
12  
13 \*To whom correspondence should be addressed. E-mail: [sako@riken.jp](mailto:sako@riken.jp)

14

15 **Abstract**

16 The cytoplasmic domain of the receptor tyrosine kinases (RTKs) plays roles as a  
17 phosphorylation enzyme and a protein scaffold but the allocation of these two functions  
18 is not fully understood. We here analyzed assembly of the transmembrane (TM)-  
19 juxtamembrane (JM) region of EGFR, one of the best studied species of RTKs, by  
20 combining single-pair FRET imaging and a nanodisc technique. The JM domain of EGFR  
21 contains a threonine residue (Thr654) that is phosphorylated after ligand association. We  
22 observed that the TM-JM peptides of EGFR form anionic lipid-induced dimers and  
23 cholesterol-induced oligomers. The two forms involve distinct molecular interactions,  
24 with a bias towards oligomer formation upon threonine phosphorylation. We further  
25 analyzed the functions and oligomerization of whole EGFR molecules, with or without a  
26 substitution of Thr654 to alanine, in living cells. The results suggested an autoregulatory  
27 mechanism in which Thr654 phosphorylation causes a switch of the major function of  
28 EGFR from kinase activation dimers to scaffolding oligomers.

29

## 30 **Introduction**

31 Epidermal growth factor receptor (EGFR) is an RTK responsible for cell proliferation and  
32 differentiation (1, 2) and consists of five domains; an extracellular domain that interacts  
33 with extracellular ligands, a single-pass transmembrane (TM) helix, a juxtamembrane  
34 (JM) domain, a cytoplasmic kinase domain, and a C-terminal tail domain for interaction  
35 with various cytoplasmic proteins (3, 4). Ligand association changes the conformation of  
36 EGFR in its extracellular domain (5) and induces formation of an asymmetric dimer of  
37 the intracellular kinase domains (6). This dimerization subsequently results in the  
38 phosphorylation of tyrosine residues on the tail domain and the recruitment of  
39 intracellular signal proteins such as GRB2 and PLC $\gamma$  containing SH2 and/or PTB domains  
40 (7). Although the atomic structures of most of the EGFR domains excluding the tail  
41 domain have been elucidated individually (5, 6, 8-10), the overall architecture of this  
42 protein has not yet been revealed, leaving several unanswered questions about the  
43 molecular mechanisms underlying its functions. The correlation between the arrangement  
44 of EGFR molecules and their function is therefore still controversial, e.g., it has long been  
45 established that the dimerization of EGFR is necessary and sufficient for kinase activation  
46 (11), whereas several studies have reported the importance of higher-order  
47 oligomerization for EGFR-mediated signal transduction (12-14).

48 The TM helix and the JM domain (TM-JM) of EGFR play important roles in the  
49 conformational coupling of ligand binding to its activation and oligomerization (9, 11,  
50 15). Previous NMR studies and molecular dynamics simulations have suggested that the  
51 TM domain forms an  $\alpha$ -helix dimer that undergoes a change in the interaction between  
52 GXXXG motives (9, 16, 17) following the ligand association with its extracellular  
53 domains (17, 18). This information regarding conformational changes in the TM dimer is  
54 then transmitted to the JM domain which comprises a JM-A (N-terminal half) region that  
55 can form an antiparallel helix dimer, and a JM-B (C-terminal half) region which makes  
56 intramolecular contact with the kinase domain (11). Both these JM regions contribute to  
57 the stable formation of an asymmetric kinase dimer conformation, which is crucial for  
58 kinase activation. The JM-A domain is rich in Lys and Arg residues, several of which are  
59 thought to interact with anionic lipid molecules of the plasma membrane and promote  
60 antiparallel dimer formation (19-21). In addition to the phospholipid species, cholesterol  
61 is a major component of the plasma membrane, mainly distributed as lipid rafts and  
62 caveolae, and has been implicated in the regulation of membrane fluidity and receptor  
63 function. Previous studies have shown that EGFR molecules are clustered in lipid rafts  
64 (14, 22), suggesting an interaction with cholesterol. Of note in this regard, it has been  
65 reported that the depletion of cholesterol induces various effects on EGFR signaling,

66 also this remains controversial (23-25). Another important factor in the regulation of  
67 EGFR through the TM-JM is the phosphorylation of Thr654 at the JM-A domain.  
68 Although Thr phosphorylation is known to be involved in EGFR deactivation, the precise  
69 mechanism of this is still elusive (26).

70 In our present study, by combining single-pair FRET measurements and  
71 nanodisc technology, we studied how the functions of anionic lipids, cholesterol, and  
72 EGFR Thr654 phosphorylation (pT654) are orchestrated to achieve the regulation of  
73 dimerization and/or oligomerization of EGFR. We previously reported that anionic lipids  
74 cause the dimerization of JM domains, and that pT654 together with acidic lipids induces  
75 the dissociation of the EGFR dimer (20). In this current study, we report that both the TM  
76 and JM protomers of EGFR are positioned closer to each other in the presence of  
77 cholesterol than in the EGFR dimers promoted by anionic lipids. Furthermore, we found  
78 that TM-JM peptides were oligomerized in cholesterol containing membranes, which was  
79 promoted by pT654. Finally, in living cells expressing whole EGFR molecules, we  
80 observed differential functional roles and oligomerization states that are dependent on the  
81 pT654 levels. Our recent study also shows that EGF-induced oligomerization of EGFR  
82 depends on the cholesterol density in the plasma membrane (27). These results suggest  
83 that the membrane cholesterol and pT654 cooperatively shift the EGFR function from the  
84 kinase dimer to the scaffold oligomer.

85

## 86 **Results**

### 87 **Incorporation of TM-JM peptides into nanodiscs**

88 Synthesized peptides of the TM-JM region of EGFR were prepared and labeled with a  
89 fluorophore Cy3 or Cy5 at the N-terminus (TM terminal region) or C-terminus (JM  
90 terminal region), respectively (Fig. 1a). The peptides were reconstituted into nanodisc  
91 structures with membrane scaffold proteins (MSPs) and lipid molecules (Fig. 1b, c).  
92 Mixtures of POPC (PC), POPS (PS), and cholesterol were used for reconstruction (Fig.  
93 1d). The nanodiscs containing cholesterol showed two peaks following size exclusion gel  
94 chromatography, one of which had a smaller disc size relative to that without cholesterol  
95 (Fig. 1e). To avoid the effects of disc size, we collected and used nanodiscs involved in  
96 the first peak fraction which had a similar size without cholesterol. This fraction was  
97 composed of the same ratio of lipids as used in the preparation (Fig. 1f). Fractions of PS  
98 (inner leaflet) and cholesterol (inner and outer leaflets) mimicked those in the plasma  
99 membrane. Synthesized TM-JM peptides with pT654 were also reconstituted into  
100 nanodiscs. The nanodisc construction was examined under a transmission electron  
101 microscope (Fig. 1g). In total, 16 types of nanodiscs were applied to subsequent single-  
102 molecule measurements.

103

### 104 **TM-TM interaction in the EGFR dimer**

105 Nanodiscs containing Cy3 and Cy5-labeled peptides were immobilized onto glass  
106 surfaces and illuminated with a 532-nm laser for Cy3 excitation. A portion of the  
107 fluorescent spots contained Cy5 fluorescence derived from the occurrence of FRET (Fig.  
108 2a, b). Based on the fluorescence intensity, we selected nanodiscs containing one Cy3-  
109 and one Cy5-labeled peptide and calculated the FRET efficiency,  $E_{FRET}$  (Fig. 2c).

110 We first examined the interactions between the N-terminal regions of the TM  
111 domains (Fig. 3). When Thr654 was not phosphorylated and the membrane contained  
112 only PC as lipid species,  $E_{FRET}$  distributed with a peak at a relatively high ( $> 0.90$ ; Table  
113 D) value (Fig. 3a), indicating close proximity of the two TM domains. There may be  
114 additional stable structures between the TM domains, as suggested by the small peaks and  
115 shoulders in the  $E_{FRET}$  distribution. The addition of anionic lipid PS caused few effects,  
116 i.e., the TM dimers were maintained as the major structure (Fig. 3b). Peptides with pT654  
117 slightly decreased the major peak positions of the  $E_{FRET}$  distributions in the PC or PC/PS  
118 membranes (Fig. 3e, f). The smooth distribution of the pT654 peptides suggested that  
119 pThr654 had homogenized possible substructures of the TM dimers of non-  
120 phosphorylated peptides. PS had little effect on the TM-TM interactions regardless of the  
121 Thr654 phosphorylation. The presence of cholesterol in the membrane concentrated the

122 distributions to a high  $E_{FRET}$  ( $> 0.95$ ) region (Fig. 3c, g, h), indicating that the N-terminal  
123 regions of TM-TM dimers were positioned in extremely close proximity. Although the  
124 peak position was similar in PC and PC/cholesterol membranes (Fig 3a, c; Table I), the  
125 distribution in PC/cholesterol membrane was more accumulated at the peak position. It  
126 also should be noted that the accumulation at a high  $E_{FRET}$  region was a remarkable  
127 observation for pT654 peptides. Thus, pT654 and the presence of membrane cholesterol  
128 decreased the distance between the two N-termini of the TM domains in cooperation. PS  
129 competed with cholesterol when Thr654 was non-phosphorylated (Fig. 3d).

130

### 131 **JM-JM interaction in the EGFR dimer**

132 To examine the effects of lipid species and pT654 on JM-JM interaction,  $E_{FRET}$   
133 distributions were determined under the C-terminus labeling (Fig. 4). In PC membrane,  
134  $E_{FRET}$  was broadly distributed with a peak around 0.81 (Fig. 4a; Table I). It is plausible  
135 that the JM-A dimers are fluctuating between minor dissociation and major association  
136 states. In the PC/PS membrane, the peak fraction was increased, indicating that PS  
137 stabilized the JM-A dimer conformation (Fig. 4b). pT654 increased the low FRET  
138 fraction in the PC/PS membrane (Fig. 4f) but showed little effect in the PC membrane  
139 (Fig. 4e). These results confirmed the results of our previous study (20). Cholesterol  
140 moved the  $E_{FRET}$  peak between non-phosphorylated peptides to higher values (0.93–0.94)  
141 regardless of whether it was a PC or PC/PS membrane (Fig. 4c, d), i.e., cholesterol forced  
142 the C-termini of the JM-A domains to position closer.

143 The mixed effects of cholesterol and pT654 on the JM-JM interaction were  
144 further examined. In the PC membrane (Fig. 4g), cholesterol increased the high FRET  
145 population to a comparable level to those shown for non-phosphorylated peptides.  
146 Cholesterol in the PC/PS membrane (Fig. 4h) reversed the  $E_{FRET}$  distribution seen in the  
147 PC/PS membrane without cholesterol (Fig. 4f) to that observed in the PC membrane (Fig.  
148 4e) i.e. minor low FRET and major high FRET states in the PC/PS/cholesterol membrane.  
149 However, it should be noted that the  $E_{FRET}$  values were not as large as those found in other  
150 conditions with cholesterol (Fig. 4c, d, g), i.e., the cholesterol effect on JM-JM interaction  
151 was partially diminished by the coexistence of PS and pThr654. Overall, our data showed  
152 that cholesterol increased the proximity between the C-terminus of JM domains in PC  
153 and PC/PS membranes, and that this effect overrode that of pThr654 in the PC/PS  
154 membrane.

155

### 156 **Higher-order oligomerization of TM-JM peptides**

157 We speculated that the accumulation of EGFR in lipid rafts, which has been reported in

158 previous studies, could be an effect of cholesterol in the raft membrane and examined the  
159 assembly of TM-JM peptides in the nanodiscs, collecting images of fluorescent spots  
160 containing only Cy3-labeled peptides to avoid interference from the effects of FRET  
161 occurring between Cy3 and Cy5. Figure 5 displays the fluorescence intensity histograms  
162 of C-terminus-labeled TM-JM peptides in nanodiscs containing or not-containing  
163 cholesterol. Cholesterol shifted the histograms toward higher intensities for the pT654  
164 peptides (Fig. 5b, d), suggesting a cooperative effect of cholesterol and Thr  
165 phosphorylation to induce higher-order assembly of the TM-JM peptides.

166

### 167 **Assembly of TM regions**

168 For analysis of the interactions between more than two TM or JM domains in the  
169 assembled structures at the N-terminus, images of fluorescent spots containing two Cy3-  
170 labeled peptides and one Cy5-labeled peptide were collected based on their 2-color  
171 fluorescence trajectories (Fig. 6a). These nanodiscs showed a variety of Cy3 donor  
172 fluorescence intensities before Cy5 photobleaching indicating that the three peptides  
173 interacted diversely. We constructed maximum fluorescence intensity histograms in the  
174 Cy3 donor channel before and after Cy5 acceptor photobleaching for inference of the  
175 interactions between three TM domains (Fig. 6b–i). In all conditions other than non-  
176 phosphorylated peptides in the PC/PS membrane, Cy3 distributions after Cy5  
177 photobleaching (red) peaked at the fluorescence intensity of ~100 (in arbitrary units),  
178 which was smaller than that observed for the C-terminal-labeled peptides (~150; Fig. 7b–  
179 i). This result must have been caused by homo-FRET (self-quenching) between two N-  
180 terminal labeled Cy3 peptides. Together with the very small intensity peaks prior to Cy5  
181 photobleaching (blue), these distributions suggested that TM regions of the three peptides  
182 (two of them were randomly labeled with Cy3) were oligomerized in very close proximity  
183 to each other in the major configuration (trimer; Fig. 6j).

184 For non-phosphorylated peptides in the PC/PS membrane however (Fig. 6c), the  
185 Cy3 intensity histogram after Cy5 photobleaching (red) had a peak intensity at ~150,  
186 indicating that two Cy3-labeled peptides in the major population were positioned  
187 separately. In addition, the low intensity shoulder in this distribution indicated the  
188 presence of proximate dimers (and trimers). Taken together, these distributions suggested  
189 that N-terminal regions of three non-phosphorylated peptides have a stronger tendency to  
190 arrange as one dimer and one monomer in the PC/PS membrane than any other condition.  
191 A similar dimer + monomer arrangement might be contained in the distributions under  
192 other conditions as a minor fraction. Consistent with this suggestion, for the non-  
193 phosphorylated peptides in PC/PS membrane before Cy5 photobleaching (Fig. 6c, blue),

194 a homo-FRET fraction ( $\sim 100$ ; with a low  $E_{FRET}$  to Cy5) was evident compared to other  
195 conditions. It should be noted that the ability of PS to promote the dimer + monomer  
196 arrangement was diminished for pT654 peptides (Fig. 6g). Cholesterol also reduced this  
197 effect of PS even for non-phosphorylated peptides (Fig. 6e). As observed in the earlier  
198 analysis of the TM-JM peptide dimer (Fig. 3), the effects of PS and cholesterol were  
199 competitive.

200

### 201 **Assembly of JM regions**

202 We constructed Cy3 fluorescence intensity histograms of two Cy3 and one Cy5 peptide  
203 with C-terminal-labeling in single nanodiscs in order to analyze the interactions between  
204 three JM domains (Fig. 7). The distributions of the Cy3 fluorescence after Cy5  
205 photobleaching (red) were similar under all conditions, exhibiting a single peak at  $\sim 150$ ,  
206 which was the fluorescence intensity of the two Cy3 molecules without strong  
207 interactions to induce homo-FRET. Both the trimer and dimer + monomer arrangements  
208 are possible if we assume that the three molecules in the trimer and two molecules in the  
209 dimer are not so close that they will induce homo FRET (Fig. 7j).

210 Prior to Cy5 photobleaching (blue), the distribution peaks were observed in the  
211 region of small Cy3 intensities indicating the proximity of both Cy3 molecules with Cy5  
212 to induce high  $E_{FRET}$ , as observed between two molecules in a nanodisc (Fig. 4), i.e., the  
213 formation of a JM trimer. An accumulation in the low intensity peak fraction was very  
214 evident for non-phosphorylated peptides in the membranes containing cholesterol (Fig.  
215 7d, e). On the other hand, fractions at the intensities similar to those observed after Cy5  
216 photobleaching were significant for pT654 peptides in the membrane without cholesterol  
217 (Fig. 7f, g). In general, pT654 peptides exhibited higher fluorescence intensity compared  
218 to non-phosphorylated peptides in the corresponding membrane lipid compositions. One  
219 possible explanation is that the fraction of high Cy3 intensity before Cy5 photobleaching  
220 represents a Cy3 dimer in the dimer + monomer arrangement of three peptides (Fig. 7j).  
221 Another possibility is that it was caused by an increased distance between three JM  
222 domains in trimers, resulting from Thr phosphorylation to reduce  $E_{FRET}$  (Fig. 7j top  
223 middle). These two arrangements could potentially coexist.

224 Considering the possible arrangement for the TM and JM regions of three TM-  
225 JM peptides together (Figs. 6 and 7), we conclude that cholesterol induces the closely  
226 proximate oligomerization of three JM domains of non-phosphorylated peptides whereas  
227 PS preferentially causes a dimer + monomer arrangement, and the Thr phosphorylation  
228 disrupts the JM dimer and facilitates oligomerization of peptides with separated JM  
229 domains in the presence of cholesterol (Fig. 8). Because of the limitation of FRET



230 measurement, we could not distinguish whether the peptides in the oligomers directly  
231 interacted or not.

232

### 233 **Effect of Thr phosphorylation on the Tyr phosphorylation of EGFR**

234 Our single-molecule structural analysis suggested that pT654 is a key regulator of the  
235 molecular assembly of EGFR, which may affect its functions. We examined this  
236 possibility in living cells. It is known that PKC activation under EGF signaling induces  
237 pT654 in EGFR. This process has been thought to be a negative feedback pathway in the  
238 EGFR system. We expressed a wild type (wt) or T654A mutant EGFR in CHO-K1 cells,  
239 which have no intrinsic expression of EGFR. An increase in pT654 was observed for wt  
240 EGFR after EGF stimulation, and treatment of these cells with phorbol-12-myristate 13-  
241 acetate (PMA), a PKC activator, caused stronger phosphorylation of Thr654 regardless  
242 of EGF stimulation (Fig. 9a). Application of a saturation amount (100 ng/ml) of EGF to  
243 the culture medium induced phosphorylation of Tyr1068 (pY1068) of both the wt and  
244 T654A mutant EGFR proteins (Fig. 9b). pY1068 is a major association site on EGFR for  
245 the adaptor protein GRB2 and its levels after EGF stimulation were significantly  
246 increased by the T654A mutation compared to wt, as expected from the negative effect of  
247 pT654. Whereas, pretreatment with PMA decreased the pY1068 level in both the wt and  
248 T654A mutant EGFR (Fig. 9c). The PMA-induced decrease in pY1068 for the wt protein  
249 could be a negative effect of increased pT654, but the similar result with the T654A  
250 mutant suggests that PMA has indirect effects independent of pT654.

251

### 252 **Single-molecule imaging of the clustering and movement of EGFR**

253 We expressed EGFR (wt and T654A) fused with GFP in CHO-K1 cells and, by using  
254 single-molecule imaging, detected cluster size distributions and lateral diffusion  
255 movements of EGFR molecules in the plasma membrane (Fig. 10a). Clustering of EGFR  
256 was measured as the fluorescence intensity distribution of EGFR spots, and the lateral  
257 diffusion movements were measured as the increase in the mean square displacement  
258 (MSD) of the spots with time. Both measurements were performed before and after 10  
259 min of EGF application to the medium. Application of EGF to the medium induced  
260 clustering and immobilization of wt EGFR as we have reported previously(14, 28). The  
261 distributions of EGFR cluster size suggest formation of oligomers containing up to more  
262 than 10 molecules (Fig. 10b). The convex shapes of MSD curve with time indicate  
263 subdiffusion of EGFR molecules (Fig. 10c).

264 Even in the absence of EGF, PMA treatment of cells increased fractions of  
265 higher-order wt EGFR oligomers (Fig. 10b left), though diffusion movements were hardly

266 affected (Fig. 10c left). This oligomerization was not as strong as that induced by EGF in  
267 the absence of PMA, and application of EGF to the PMA treated cells did not induce  
268 further oligomerization at least up to 10 min but significantly decreased mobility. While  
269 in cells without PMA treatment, application of EGF induced strong oligomerization and  
270 immobilized wt EGFR. For T654A mutant, PMA treatment hardly affected both  
271 oligomerization (Fig. 10b right) and movements (Fig. 10c right) in the absence of EGF.  
272 EGF induced strong oligomerization and immobilization of T654A mutant independent  
273 of PMA treatment. The effects of PMA to induce EGFR oligomerization that was  
274 dependent on Thr654 were consistent with pT654-induced oligomerization of TM-JM  
275 peptides in nanodiscs.

276 In summary, single-molecule measurements suggest three states of EGFR  
277 oligomerization depends on pT654 and EGF association (Fig. 10d). PMA treatment of wt  
278 EGFR but not T654A mutant induced a medial level of oligomerization, which could be  
279 stabilized by pT654. Strong oligomerization observed under the weak pT654 level in wt  
280 EGFR and no pT654 in T654A mutant was caused by a distinct mechanism of pT654. On  
281 the other hand, it is possible that immobilization of EGFR relates with its tyrosine  
282 phosphorylation levels as we have observed previously (29). The EGF-induced  
283 immobilization in the presence of PMA was more evident in T654A mutant in which  
284 pY1068 level was higher than that in wt EGFR (Fig. 9), and PMA treatment decreased  
285 immobilization and pY1068 in wt EGFR.

286

### 287 **Interaction of EGFR with GRB2**

288 We finally measured the interaction of EGFR with GRB2 in living cells using a split  
289 luciferase (NanoBiT) assay, in which the C-terminus of EGFR and the N-terminus of  
290 GRB2 were conjugated with the large BiT (LgBiT) and the small BiT (SmBiT) of  
291 NanoLuc luciferase (30), respectively. The association of EGFR and GRB2 promoted the  
292 formation of active luciferase to produce chemiluminescence emission (Fig. 11a). In the  
293 timecourses of the NanoBiT signal increases after EGF treatment of cells expressing the  
294 wt or T654A mutant EGFR (Fig. 11b), the maximum intensities indicated a dose  
295 dependent response to the EGF concentration in the medium (Fig. 11b, c). The maximum  
296 intensity was significantly increased after pretreatment with PMA in cells expressing wt  
297 EGFR, despite the fact that the pY1068 level was reduced after the PMA treatment (Fig.  
298 9c). This effect of PMA was not observed to any extent with the T654A mutant, and the  
299 GRB2 association was not increased by this mutation in the absence of PMA, even though  
300 the pY1068 level after EGF stimulation was significantly increased in the mutant (Fig.  
301 9c). The increase in GRB2 association observed for wt EGFR after PMA treatment was

302 not likely to be an indirect effect of PMA because it was not observed for the T654A  
303 mutant, in which the pY1068 level was also affected by PMA. These results suggest that  
304 pT654 promotes the formation of a GRB2 recognition state for EGFR, and that the  
305 inhibition of Thr654 phosphorylation prevents a GRB2-EGFR association in spite of  
306 enhanced Tyr1068 phosphorylation.  
307

## 308 Discussion

309 We have here studied the dimerization and oligomerization of EGFR molecules by  
310 reconstituting its TM-JM peptides into nanodiscs. As expected from the positively  
311 charged JM-A sequence and accumulation of EGFR in the raft membrane, PS and  
312 cholesterol affect the molecular assembly of the TM-JM peptides. Interestingly, these two  
313 lipid species each function in a specific fashion i.e. the  $E_{FRET}$  distributions between the  
314 two TM-JM peptides in the nanodiscs suggested that PS facilitates JM dimerization, while  
315 cholesterol induces closer positioning of both the TM and JM domains (Figs. 3 and 4). In  
316 addition, cholesterol promoted the oligomeric assembly of TM-JM peptides (Figs. 6 and  
317 7). We herein propose schematic models for the formation of the EGFR TM-JM dimers  
318 and trimers under various conditions of lipid exposure and Thr654 phosphorylation (Fig.  
319 8), in which PS and cholesterol exert competitive effects on dimerization and  
320 oligomerization, and pT654 disrupts the PS-induced JM dimer, thus promoting  
321 oligomerization of the peptides.

322 It should be noted that the  $E_{FRET}$  distribution was broad in every one of our  
323 observations in this present study, especially between JM domains, indicating multiple  
324 configurations coexisting under each condition. Non-phosphorylated peptide dimers  
325 showed a peak at around  $E_{FRET} > 0.90$  and  $> 0.81$  both for N- and C-terminus labeling,  
326 respectively. We can attribute this configuration to that suggested in a previous NMR  
327 study, in which two JM domains form an anti-parallel helix dimer (9). PS stabilized this  
328 configuration probably at the JM side of the non-phosphorylated peptide. Acidic lipids  
329 are known to interact with the positively charged JM-A domain (19, 31) whereas  
330 cholesterol induced more proximation of the two peptides at the both N- and C-termini in  
331 the major configuration ( $E_{FRET}$  0.95 and 0.93), which must be distinct from the  
332 arrangement containing antiparallel JM helices (Fig. 8). If the TM-JM domains of whole  
333 EGFR dimer adopt similar configurations as suggested for the TM-JM peptides in the  
334 nanodiscs, the arrangement of two kinase domains indicates namely, the kinase activity  
335 would be affected by the lipid composition and by pT654 (Fig. 11d).

336 Cholesterol was found in our current analysis to increase the population of  
337 nanodiscs containing three TM-JM peptides with pT654 (Fig. 5). The fluorescence  
338 intensity distributions of the two Cy3 probes among the three peptides in the presence of  
339 cholesterol suggested that a close trimer was the major configuration (Figs. 6 and 7). The  
340 cholesterol-induced oligomerization of TM peptides with a short JM region (to T654) of  
341 EGFR in liposomes has been reported previously from NMR analysis (32). In that report  
342 however, pT654 in the peptide showed no obvious effect on the oligomerization in PC  
343 and PC/cholesterol liposomes (without any acidic lipids), consistent with our current and

344 previous results indicating interplay of acidic lipids and pT654. The induction of  
345 oligomerization seems to be a general effect of cholesterol upon  $\alpha$ -helix peptides in lipid  
346 bilayers (33). Our result does not necessarily mean trimerization in the physiological  
347 conditions but reflects a tendency of oligomerization. We picked up trimers in the analysis  
348 to avoid complexity in the interactions between more than three molecules. While in the  
349 PC/PS membrane without cholesterol (Figs. 6 and 7), the probability to adopt a one dimer  
350 + one monomer configuration seems to be increased for the non-phosphorylated peptides,  
351 likely because peptides have difficulty forming trimers when containing the anti-parallel  
352 helix JM dimer, the pT654 event appears to dissociate the JM dimer to help in the  
353 formation of the close trimer especially in the presence of cholesterol. If this assumption  
354 is correct, oligomer formation will be inhibitory for EGFR kinase activity. Our observed  
355 increases in the pY1068 level in the T654A mutant of EGFR (Fig. 9) support this  
356 possibility.

357         Recently, we studied the effects of cholesterol depletion on EGF signaling under  
358 the same experimental condition as used in this study (27). Treatment of cells with  
359 methyl- $\beta$ -cyclodextrin increased the fraction of preformed EGFR dimers and induced  
360 hyperphosphorylation of Y1068 and Y1173 of EGFR upon EGF stimulation.  
361 Nevertheless, cholesterol depletion diminished reactions downstream of EGFR  
362 autophosphorylation, including the translocation of GRB2 to the cell surface and  
363 phosphorylations of SHC, AKT, and ERK. It also strongly inhibited the EGF-induced  
364 clustering of EGFR over dimers. These observations are consistent with those of the  
365 current study, suggesting biphasic functions of membrane cholesterol on the EGF  
366 signaling. Cholesterol inhibits EGFR dimerization for kinase activation but promotes  
367 oligomerization of the (relatively small amount of) tyrosine-phosphorylated EGFR to  
368 enhance signaling to the downstream molecules.

369         The antiparallel helix dimer of JM is thought to facilitate asymmetric interaction  
370 between the kinase domains of EGFR, and hence its activation, in order to phosphorylate  
371 tyrosine residues in the C-tail (11, 34). This tyrosine phosphorylation results in the  
372 recruitment of PKC and other threonine kinases from the cytoplasm to the EGFR  
373 molecules for the phosphorylation of Thr654, which is known to negatively regulate  
374 EGFR signaling (26, 35). Our previous results suggested that the mechanism underlying  
375 this negative effect of pT654 is the dissociation of JM dimers in the presence of acidic  
376 lipids (20). At the same time, pT654 might induce the oligomerization of EGFR in the  
377 presence of cholesterol. Supporting this possibility, our current single-molecule imaging  
378 in living cells revealed the oligomerization of unliganded wt EGFR after PMA treatment,  
379 which induced pT654 (Fig. 10). In the unliganded condition, the extracellular domains of

380 EGFR are thought to prevent the JM dimerization for kinase activation (9, 36). Clustering  
381 of EGFR is also prevented largely in the unliganded condition. However, probably due to  
382 the structural fluctuation, a small part of the unliganded EGFR oligomerized (27). pT654  
383 (PMA) stabilized the unliganded oligomers possibly destructing the JM antiparallel  
384 dimers.

385 We previously reported that oligomers of EGFR formed after cell stimulation  
386 with EGF function as the major signal transduction sites for GRB2, where the dissociation  
387 rate constant with GRB2 was reduced increasing the affinity between single-molecules  
388 of EGFR and GRB2 (14). In addition, our current analyses found an increase in the wt  
389 EGFR/GRB2 association following PMA treatment (Fig. 11). We speculate that after the  
390 initial Tyr phosphorylation, successive Thr phosphorylation reduces Tyr kinase activity  
391 of EGFR but enhances the formation of signal transduction oligomer in the medium  
392 immobilized and oligomerized state of EGFR molecules (Fig. 10d). Further  
393 immobilization and oligomerization were found in our current experiments to be induced  
394 by EGF in the absence of PMA for wt EGFR and with or without PMA for the T654A  
395 mutant. This process might include EGFR molecules accumulated into the clathrin coated  
396 pits (37) and be independent of pT654. In the previous report (38), ERK activation was  
397 reduced by the Thr654/669 of EGFR to Ala substitution suggesting only negative effects  
398 of Thr654, however, oligomerization of EGFR was not observed in this report. In addition,  
399 because tyrosine phosphorylation is a prerequisite for EGFR signaling, strong inhibition  
400 of the kinase activation will prevent the downstream signaling even after the  
401 oligomerization of EGFR. In our experimental condition, even though pT654 was  
402 inhibitory for EGFR kinase activity, it promoted signal transduction downstream.

403 Based on our present results, we propose a model of EGFR signaling regulated  
404 by membrane lipids and Thr654 phosphorylation (Fig. 11d). The signal transduction  
405 mediated by EGFR is a complex multi-step process. Conformational changes in the  
406 extracellular domain of EGFR upon ligand association allow JM domains to form anti-  
407 parallel JM helix dimers and asymmetric kinase domain dimers(11, 34). This is the  
408 activation process for EGFR kinase, in which acidic membrane lipids and cholesterol play  
409 stimulative and inhibitory roles, respectively (20, 27). Tyrosine phosphorylation in the  
410 kinase-active EGFR dimers recruits PKC from the cytoplasm (39). The association of  
411 PLC $\gamma$  to the EGFR phosphotyrosine for the degradation of PIP $_2$  is involved in this process.  
412 PKC then phosphorylates Thr654 (40), which dissociates anti-parallel JM dimers in the  
413 presence of remaining acidic lipids and supports the oligomerization of EGFR in the  
414 presence of cholesterol, especially after the removal of acidic lipids around the EGFR  
415 molecules. The cholesterol-induced oligomer of EGFR is a major site of interaction with

416 cytoplasmic proteins including GRB2 (14). Thus, a major function of EGFR is shifted  
417 from a kinase for self-activation to a scaffold for signal transduction. Thr654  
418 phosphorylation is a key step underlying this role change of EGFR and is not merely an  
419 inactivating mechanism. The degradation of PIP<sub>2</sub>, a major anionic lipid in the inner leaflet  
420 of the plasma membrane, may support this role change. Importantly, both Thr654  
421 phosphorylation and PIP<sub>2</sub> degradation are caused by the kinase activation of EGFR.  
422 Hence, this represents an ingenious autoregulatory process involving membrane proteins  
423 and lipids.  
424

## 425 **Materials and Methods**

### 426 **Materials**

427 1-palmitoyl-2-oleoyl-*sn*-phosphatidylcholine (PC), 1-palmitoyl-2-oleoyl-*sn*-  
428 phosphatidylserine (PS), and cholesterol were purchased from Avanti Polar Lipids  
429 (Alabaster, AL) as chloroform solutions (PC and PS) or powders (cholesterol). Cy3-  
430 maleimide and Cy5-maleimide were purchased from GE Healthcare Life Sciences (Little  
431 Chalfont, UK). n-octyl- $\beta$ -D-glucoside (OG) was purchased from Dojindo (Kumamoto,  
432 Japan). Monofunctional polyethylene glycol-succinimidyl valerate (s-PEG, 5000 mol wt)  
433 and biotinylated monofunctional polyethylene glycol-succinimidyl valerate (b-PEG,  
434 5000 mol wt) were purchased from Laysan Bio (Arab, AL). Chinese hamster ovary K1  
435 (CHO-K1) cells were provided from RIKEN BRC through the National Bio-Resource  
436 Project (MEXT, Tokyo, Japan).

437

### 438 **Plasmid construction**

439 Construction of the cDNA of full-length human EGFR (wt) fused with GFP was described  
440 previously (14). T654A mutant DNA was constructed using PrimeSTAR Max (Takara,  
441 Kusatsu, Japan) in the wt EGFR vector. The primer sequences were as follows:  
442 EGFR(T654A)-f: GAAGCGCGCGCTGCGGAGGCTGCTGC and EGFR(T654A)-r:  
443 CCGCAGCGCGCGCTTCCGAACGATGTG, respectively. For NanoBiT assays, full-  
444 length human EGFR (wt or T654A mutant) was fused with LgBiT at the C-terminus (wt  
445 or T654A EGFR-LgBiT), and GRB2 was fused with SmBiT at the N-terminus (GRB2-  
446 SmBiT) as follows. The LgBiT fragment amplified from pBiT1.1-C [TK/LgBiT] Vector  
447 (Promega) using KOD One PCR Master Mix (TOYOBO) was subcloned into the AgeI-  
448 and NotI-digested EGFP-N1 vector (Clontech), and subsequently full-length EGFR  
449 fragment was subcloned into the NheI- and HindIII-digested the LgBiT-inserted EGFP-  
450 N1 vector. The GRB2-SmBiT fragment was constructed using KOD One PCR Master  
451 Mix (TOYOBO), and subcloned into the AgeI- and SallI-digested EGFP-C2 vector  
452 (Clontech). The primer sequence of SmBiT was designed from pBiT2.1-N [TK/SmBiT]  
453 Vector (Promega).

454

### 455 **Peptide synthesis and purification**

456 Peptides corresponding to the TM-JM regions of EGFR (618-666) were synthesized by  
457 solid-phase methods with the sequence KIPSIATGMV GALLLLLVALGIGLFM-  
458 RRRHIVRKRT<sub>654</sub>LRLLQERELVE-NH<sub>2</sub> (28). For the experiments with the C-terminal  
459 labeled EGFR peptide, peptides containing a cysteine at the C-terminus were synthesized.  
460 These synthetic peptides were purified by reverse-phase high-performance liquid



461 chromatography on a C4 column with a gradient of 1-propanol and acetonitrile (1:1) over  
462 0.1% aqueous trifluoroacetic acid. To prepare the C-terminal labeled peptide, Cy3-  
463 maleimide or Cy5-maleimide was introduced to the sulfide group on the cysteine at the  
464 C-terminus of the TM-JM peptide by mixing the peptide and the fluorescence derivative  
465 in dimethylformamide under basic conditions. For experiments with the N-terminal  
466 labeled peptide, Cy3-COOH or Cy5-COOH was reacted with an elongating peptide on  
467 the resin in the presence of 1-[bis(dimethylamino)methylene]-1H-benzotriazolium 3-  
468 oxide hexafluorophosphate (HBTU) and diisopropylethylamine (DIEA), which activate  
469 the carboxyl group on the fluorophore derivative. For synthesis of Thr654 phosphorylated  
470 peptides, phosphorylated threonine derivatives were utilized. The purity was confirmed  
471 by reverse-phase high-performance liquid chromatography and matrix-assisted laser-  
472 desorption/ionization time-of-flight mass spectroscopy analysis.

473

#### 474 **Nanodisc preparation**

475 For nanodisc construction, fluorescent EGFR TM-JM peptides co-solubilized with lipids  
476 and OG in hexafluoroisopropanol were first dried to form thin films. These peptide films  
477 were then resolubilized in buffer A (0.5 M NaCl, 20 mM Tris/Cl, 0.5 mM EDTA)  
478 containing 30 mM OG and 5 mM dithiothreitol (pH 7.5). His8-tagged MSP 1E3D1 (MSP)  
479 was expressed in *E. coli* and purified as described previously (41). The concentration of  
480 MSP was quantified based on the absorbance at 280 nm ( $29,910 \text{ M}^{-1}\text{cm}^{-1}$ ). Thin PC or PS  
481 films were formed by evaporation of the solvent (chloroform) under a stream of nitrogen  
482 gas and dried in vacuum. Cholesterol powders were first dissolved in chloroform, and a  
483 thin film was formed as described above. PC, PS, and cholesterol were resuspended in  
484 buffer A containing 0.4 M sodium cholate (pH 7.5) at a final concentration of 10 mM.  
485 Cy3- and Cy5-labeled TM-JM peptides in buffer A were mixed in equal amounts and then  
486 conjugated with MSP and phospholipid mixtures (PC, PC/PS, PC/cholesterol,  
487 PC/PS/cholesterol) at a molar ratio of 1:1:120  $\mu\text{M}$  (TM-JM/MSP/lipids). The mixture was  
488 dialyzed against a buffer containing 0.5 M NaCl, 20 mM Tris/Cl, and 5 mM EDTA (pH  
489 7.5) at 4°C to reconstitute the nanodiscs by removing the detergent. The aggregates and  
490 liposomes were removed from the mixture by size-exclusion chromatography using a  
491 Superdex 200 Increase column (GE Healthcare Life Sciences) and the peak fractions  
492 containing nanodiscs of around 11 nm in diameter were collected.

493

#### 494 **Single-pair FRET (spFRET) measurements**

495 Nanodisc samples were immobilized on the surface of a glass chamber as described  
496 previously (20, 43, 44). Briefly, amine-modified glass surfaces were coated with 99% s-

497 PEG and 1% b-PEG. NeutrAvidin (Thermo Fisher Scientific, Waltham, MA) was then  
498 bound to the b-PEG. The nanodisc samples bound with biotinylated anti-His8-tag  
499 antibody (MBL Life Science) were loaded into the glass chamber and allowed to bind to  
500 the NeutrAvidin-coated glass surface, after which unbound nanodiscs were washed away.  
501 To reduce the photobleaching rate of Cy3 and Cy5, the nanodisc-loaded chamber was  
502 filled with dialysis buffer containing 2-mercaptoethanol at the final concentration of 0.5%  
503 (w/v). The fluorescence of Cy3 and Cy5 was observed under a TIRF microscope based  
504 on an inverted microscope (Ti2; Nikon) with a 60x oil-immersion objective (ApoTIRF  
505 60x 1.49 NA; Nikon). The fluorescence activity of Cy3 was excited using a 532 nm laser  
506 (Compass 315M-100). Dual-color imaging was carried out through a 4x relay lens by  
507 using two EMCCD cameras (C9100-134, ImagEM; Hamamatsu Photonics, Hamamatsu,  
508 Japan) with a 200x EM gain. Images of 512 x 512 pixels (67 nm/pixel) were recorded  
509 with a temporal resolution of 100 ms/frame using MetaMorph (Molecular Devices, San  
510 Jose, CA) or AIS (ZIDO, Toyonaka, Japan).

511

### 512 **Analysis of FRET signals**

513 The measurement of fluorescence intensities of single nanodiscs was performed using  
514 ImageJ software, as described previously (45). The background noise was filtered out  
515 using the Subtract Background function in ImageJ. Fluorescence intensities of Cy3 and  
516 Cy5 in single nanodiscs were measured as averages from circles with a diameter of 12  
517 pixels containing a fluorescence spot. The average intensity of the same sized circles in  
518 which no spot was present was subtracted as the background. Along the fluorescence  
519 trajectories of TM-JM-Cy3 and TM-JM-Cy5, the FRET efficiency,  $E_{FRET}$ , for each frame  
520 ( $> 2000$ ) was calculated from the fluorescence intensities in the donor  $I_D$  and FRET  $I_A$   
521 channels as

$$522 \quad E_{FRET} = \frac{I_A - \beta I_D}{I_A + (\gamma - \beta) I_D},$$

523 where  $\beta$  and  $\gamma$  are coefficients for the compensation of fluorescence leakage from the  
524 donor dye to the acceptor detector channel, and the difference in the detection efficiencies  
525 of the dyes, respectively (46). Coefficients were calculated using the intensity time traces  
526 as  $\beta = 0.03$  and  $\gamma = 0.4$ , respectively.  $E_{FRET}$  distributions were all different in Kolmogorov-  
527 Smirnov (KS) test with a rejection  $p < 0.006$ . The peak positions and their 95% percentile  
528 section were estimated using bootstrap method from a discretized  $E_{FRET}$  distribution  
529 (Table I), in which the bin width was set to 0.02 and the resampling number was 300. KS  
530 test was done using “StatsKSTest” in Igor Pro 8.0 (WaveMetrix). Resampling for

531 bootstrap method was done using “sample” function in R.

532

### 533 **Cell culture and transfection**

534 CHO-K1 cells were maintained in HAM F12 medium supplemented with 10% fetal  
535 bovine serum at 37°C under 5% CO<sub>2</sub>. HEK293S cells were maintained in DMEM F12  
536 medium supplemented with 10% fetal bovine serum at 37°C under 5% CO<sub>2</sub>. For western  
537 blotting assays, DNA constructs of full-length wt and T654A EGFR (1 µg) were  
538 transiently transfected into CHO-K1 cells using FuGENE HD Transfection Reagent  
539 (Promega, Madison, WI). For single-molecule measurements, CHO-K1 cells were  
540 transfected with either a wt or T654A EGFR-GFP gene (0.5 µg each) using Lipofectamine  
541 3000 Reagent (Thermo Fisher Scientific). For NanoBiT assays, HEK293S cells were  
542 transfected with a mixture of wt or T654A EGFR-LgBiT gene (1 µg each) and GBR2-  
543 SmBiT (0.2 µg) using Lipofectamine 3000 Reagent in 60 mm dish.

544

### 545 **PMA treatment and EGF stimulation**

546 DNA constructs of full-length wt and T654A EGFR were transfected and cultured with  
547 10% fetal bovine serum (FBS) on the day before each measurement. Cells were then  
548 starved in modified Eagle’s medium without FBS for 3 hours before the experiment.  
549 Phorbol 12-myristate 13-acetate (PMA) was dissolved in DMSO and subsequently  
550 diluted in PBS to a final concentration of 10 µM. For PMA pre-treatment, PMA solution  
551 was added to the cell cultured medium at a final concentration of 100 nM and incubated  
552 for 30 min at room temperature. For EGF stimulation, EGF (PeproTech, Cranbury, NJ)  
553 dissolved in PBS was added to the cell cultured medium at a final concentration of 100  
554 ng/mL (for western blotting assays and single-molecule measurements) or as a 0.001 to  
555 100 nM dilution series (for the NanoBiT assay).

556

### 557 **Western blotting analysis**

558 In cells stimulated with EGF for 0, 5, 30 min at 37°C, threonine and tyrosine  
559 phosphorylation of the wt and mutant T654A proteins was detected by western blotting  
560 using rabbit anti-pT654 (ab75986; Abcam, Cambridge, UK) and rabbit anti-pY1086  
561 antibody (#4407; Cell Signaling Technology, Danvers, MA), respectively. Rabbit anti-  
562 EGFR antibody (#sc-03; Santa Cruz Biotechnology, Dallas, TX) was used to detect  
563 protein expression. After being resolved by SDS-polyacrylamide gel electrophoresis  
564 (PAGE), the electrophoresed proteins were transferred onto a polyvinylidene difluoride  
565 (PVDF) membrane and incubated with each antibody (primary antibody) and then with a  
566 horseradish peroxidase (HRP)-linked anti-rabbit IgG (secondary antibody; 7076, Cell

567 Signaling Technology). Immunoreactive proteins were detected with Amersham ECL  
568 Prime Western Blotting Detection Reagent (GE Healthcare) using an ImageQuant LAS  
569 500 device (GE Healthcare).

570

### 571 **Single-molecule imaging in living cells**

572 The methods for single-molecule measurement and analysis were described elsewhere  
573 (Yanagawa and Sako, *Methods in Mol Biol*, in press; bioRxiv: doi:  
574 10.1101/2020.06.08.141192). The single-molecule imaging of EGFR was performed at  
575 the basal plasma membrane of the CHO-K1 cells at 25°C with the same microscopic  
576 methods used for the spFRET measurements. The laser wavelength was 488 nm (Sapphire  
577 488; Coherent, Santa Clara, CA) for the excitation of the GFP. Fluorescence images were  
578 acquired every 50 ms using AIS software. The acquired multiple TIFF files were  
579 processed by ImageJ software as follows: background subtraction was performed with a  
580 rolling ball radius of 25 pixels, and two-frame averaging of the images was then  
581 performed. Single-molecule tracking analysis was performed with AAS software (ZIDO).  
582 All subsequent analyses were performed using smDynamicsAnalyzer  
583 (<https://github.com/masataka-yanagawa/IgorPro8-smDynamicsAnalyzer>), an Igor Pro  
584 8.0-based homemade program.

585

### 586 **NanoBiT assay**

587 HEK293S cells co-transfected with the plasmids of wt or T654A EGFR-LgBiT and  
588 GRB2-SmBiT. Overnight after the transfection, cells were collected in 0.5 mM EDTA-  
589 containing PBS, centrifuged, and suspended in 2 mL of HBSS containing 0.01 % bovine  
590 serum albumin and 5 mM HEPES (pH 7.4) (assay buffer). The cell suspension was  
591 dispensed in a 96-well white bottom plate at a volume of 80  $\mu$ L per well and loaded with  
592 20  $\mu$ L of 25  $\mu$ M Nano-Glo Vivazine Live Cell Substrates (Promega) diluted in the assay  
593 buffer. After incubation for 2 hrs at room temperature in the assay buffer, cells were  
594 pretreated with PMA or vehicle as described above. Basal luminescence was then  
595 measured by using a microplate reader (SpectraMax L, Molecular Devices) with an  
596 interval of 60 sec at room temperature. After 10 min, 20  $\mu$ L of the EGF dilution series in  
597 the assay buffer or the assay buffer (vehicle) were applied to each well using a benchtop  
598 multi-pipetter (EDR-384SR, BioTec, Tokyo, Japan) under red dim light. Then,  
599 luminescence was measured for 30 min with an interval of 60 sec. Each time-course of  
600 luminescence counts was normalized with the luminescence counts of the vehicle-added  
601 well. Dose-response curves were fitted with a Hill-equation to determine the maximum  
602 intensity.

603 **Acknowledgments**

604 YS was supported by MEXT Japan with Grants-in-Aid for Scientific Research  
605 (19H05647) and by JST CREST (JPMJCR1912). We thank Hiromi Sato for technical  
606 assistance.

607

608 **Author contributions**

609 Conceptualization, R.M., Y.S.; methodology, R.M., T.S., M.Y., Y.S.; investigation, R.M.,  
610 H. T., T. S., M.Y.; manuscript writing, R.M., T. S., Y.S. with feedback from all other  
611 coauthors; funding acquisition, Y.S.; supervision, Y.S.

612

613 **Conflicts of interest**

614 None.

615

## 616 **References**

- 617 1. M. A. Olayioye, R. M. Neve, H. A. Lane, N. E. Hynes, The ErbB signaling network:  
618 receptor heterodimerization in development and cancer. *EMBO J.* **19**, 3159-3167  
619 (2000).
- 620 2. M. K. Nyati, M. A. Morgan, F. Y. Feng, T. S. Lawrence, Integration of EGFR inhibitors  
621 with radiochemotherapy. *Nat. Rev. Cancer* **6**, 876-885 (2006).
- 622 3. E. Kovacs, J. A. Zorn, Y. Huang, T. Barros, J. Kuriyan, A structural perspective on the  
623 regulation of the epidermal growth factor receptor. *Annu. Rev. Biochem.* **84**, 739-764  
624 (2015).
- 625 4. N. J. Bessman, M. A. Lemmon, Finding the missing links in EGFR. *Nat. Struct. Mol.*  
626 *Biol.* **19**, 1-3 (2012).
- 627 5. H. Ogiso *et al.*, Crystal structure of the complex of human epidermal growth factor and  
628 receptor extracellular domains. *Cell* **110**, 775-787 (2002).
- 629 6. X. Zhang, J. Gureasko, K. Shen, P. A. Cole, J. Kuriyan, An allosteric mechanism for  
630 activation of the kinase domain of epidermal growth factor receptor. *Cell* **125**, 1137-  
631 1149 (2006).
- 632 7. M. J. Wagner, M. M. Stacey, B. A. Liu, T. Pawson, Molecular mechanisms of SH2- and  
633 PTB-domain-containing proteins in receptor tyrosine kinase signaling. *Cold Spring*  
634 *Harb Perspect Biol* **5**, a008987 (2013).
- 635 8. K. M. Ferguson *et al.*, EGF activates its receptor by removing interactions that  
636 autoinhibit ectodomain dimerization. *Mol. Cell* **11**, 507-517 (2003).
- 637 9. N. F. Endres *et al.*, Conformational coupling across the plasma membrane in activation  
638 of the EGF receptor. *Cell* **152**, 543-556 (2013).
- 639 10. E. R. Wood *et al.*, A unique structure for epidermal growth factor receptor bound to  
640 GW572016 (Lapatinib): relationships among protein conformation, inhibitor off-rate,  
641 and receptor activity in tumor cells. *Cancer Res.* **64**, 6652-6659 (2004).
- 642 11. N. Jura *et al.*, Mechanism for activation of the EGF receptor catalytic domain by the  
643 juxtamembrane segment. *Cell* **137**, 1293-1307 (2009).
- 644 12. S. E. Webb *et al.*, Single-molecule imaging and fluorescence lifetime imaging microscopy  
645 show different structures for high- and low-affinity epidermal growth factor receptors in  
646 A431 cells. *Biophys. J.* **94**, 803-819 (2008).
- 647 13. Y. Huang *et al.*, Molecular basis for multimerization in the activation of the epidermal  
648 growth factor receptor. *Elife* **5** (2016).
- 649 14. M. Hiroshima *et al.*, Transient Acceleration of Epidermal Growth Factor Receptor  
650 Dynamics Produces Higher-Order Signaling Clusters. *J. Mol. Biol.* **430**, 1386-1401  
651 (2018).

- 652 15. N. Jura, Y. Shan, X. Cao, D. E. Shaw, J. Kuriyan, Structural analysis of the catalytically  
653 inactive kinase domain of the human EGF receptor 3. *Proc Natl Acad Sci U S A* **106**,  
654 21608-21613 (2009).
- 655 16. S. J. Fleishman, J. Schlessinger, N. Ben-Tal, A putative molecular-activation switch in  
656 the transmembrane domain of erbB2. *Proc Natl Acad Sci U S A* **99**, 15937-15940  
657 (2002).
- 658 17. A. Arkhipov *et al.*, Architecture and membrane interactions of the EGF receptor. *Cell*  
659 **152**, 557-569 (2013).
- 660 18. M. Lelimosin, V. Limongelli, M. S. Sansom, Conformational Changes in the Epidermal  
661 Growth Factor Receptor: Role of the Transmembrane Domain Investigated by Coarse-  
662 Grained MetaDynamics Free Energy Calculations. *J. Am. Chem. Soc.* **138**, 10611-10622  
663 (2016).
- 664 19. C. Matsushita *et al.*, Transmembrane helix orientation influences membrane binding of  
665 the intracellular juxtamembrane domain in Neu receptor peptides. *Proc Natl Acad Sci U*  
666 *SA* **110**, 1646-1651 (2013).
- 667 20. R. Maeda, T. Sato, K. Okamoto, M. Yanagawa, Y. Sako, Lipid-Protein Interplay in  
668 Dimerization of Juxtamembrane Domains of Epidermal Growth Factor Receptor.  
669 *Biophys. J.* **114**, 893-903 (2018).
- 670 21. K. B. Abd Halim, H. Koldso, M. S. P. Sansom, Interactions of the EGFR juxtamembrane  
671 domain with PIP2-containing lipid bilayers: Insights from multiscale molecular dynamics  
672 simulations. *Biochim Biophys Acta* **1850**, 1017-1025 (2015).
- 673 22. Y. Wang *et al.*, Regulation of EGFR nanocluster formation by ionic protein-lipid  
674 interaction. *Cell Res.* **24**, 959-976 (2014).
- 675 23. Y. Liu *et al.*, The involvement of lipid rafts in epidermal growth factor-induced  
676 chemotaxis of breast cancer cells. *Mol. Membr. Biol.* **24**, 91-101 (2007).
- 677 24. T. Furuchi, R. G. Anderson, Cholesterol depletion of caveolae causes hyperactivation of  
678 extracellular signal-related kinase (ERK). *J. Biol. Chem.* **273**, 21099-21104 (1998).
- 679 25. T. Ringerike, F. D. Blystad, F. O. Levy, I. H. Madshus, E. Stang, Cholesterol is  
680 important in control of EGF receptor kinase activity but EGF receptors are not  
681 concentrated in caveolae. *J. Cell Sci.* **115**, 1331-1340 (2002).
- 682 26. K. A. Lund *et al.*, Phosphorylation of the Epidermal Growth-Factor Receptor at  
683 Threonine 654 Inhibits Ligand-Induced Internalization and down-Regulation. *J. Biol.*  
684 *Chem.* **265**, 20517-20523 (1990).
- 685 27. M. Hiroshima *et al.*, Membrane cholesterol interferes with tyrosine phosphorylation but  
686 facilitates the clustering and signal transduction of EGFR. *bioRxiv*  
687 10.1101/2021.08.28.457965 (2021).

- 688 28. M. Hiroshima, Y. Saeki, M. Okada-Hatakeyama, Y. Sako, Dynamically varying  
689 interactions between heregulin and ErbB proteins detected by single-molecule analysis  
690 in living cells. *Proc Natl Acad Sci U S A* **109**, 13984-13989 (2012).
- 691 29. M. Yasui, M. Hiroshima, J. Kozuka, Y. Sako, M. Ueda, Automated single-molecule  
692 imaging in living cells. *Nat Commun* **9**, 3061 (2018).
- 693 30. A. S. Dixon *et al.*, NanoLuc Complementation Reporter Optimized for Accurate  
694 Measurement of Protein Interactions in Cells. *ACS Chem Biol* **11**, 400-408 (2016).
- 695 31. T. Sato, P. Pallavi, U. Golebiewska, S. McLaughlin, S. O. Smith, Structure of the  
696 membrane reconstituted transmembrane-juxtamembrane peptide EGFR(622-660) and  
697 its interaction with Ca<sup>2+</sup>/calmodulin. *Biochemistry* **45**, 12704-12714 (2006).
- 698 32. D. H. Jones, K. R. Barber, C. W. Grant, The EGF receptor transmembrane domain: 2H  
699 NMR study of peptide phosphorylation effects in a bilayer environment. *Biochemistry*  
700 **37**, 7504-7508 (1998).
- 701 33. K. Matsuzaki, Why and how are peptide-lipid interactions utilized for self-defense?  
702 Magainins and tachyplesins as archetypes. *Biochim Biophys Acta* **1462**, 1-10 (1999).
- 703 34. M. Red Brewer *et al.*, The juxtamembrane region of the EGF receptor functions as an  
704 activation domain. *Mol. Cell* **34**, 641-651 (2009).
- 705 35. X. Li, Y. Huang, J. Jiang, S. J. Frank, ERK-dependent threonine phosphorylation of EGF  
706 receptor modulates receptor downregulation and signaling. *Cell. Signal.* **20**, 2145-2155  
707 (2008).
- 708 36. H. J. Zhu, J. Iaria, S. Orchard, F. Walker, A. W. Burgess, Epidermal growth factor  
709 receptor: association of extracellular domain negatively regulates intracellular kinase  
710 activation in the absence of ligand. *Growth Factors* **21**, 15-30 (2003).
- 711 37. L. K. Goh, F. Huang, W. Kim, S. Gygi, A. Sorkin, Multiple mechanisms collectively  
712 regulate clathrin-mediated endocytosis of the epidermal growth factor receptor. *J. Cell*  
713 *Biol.* **189**, 871-883 (2010).
- 714 38. M. Kluba, Y. Engelborghs, J. Hofkens, H. Mizuno, Inhibition of Receptor Dimerization  
715 as a Novel Negative Feedback Mechanism of EGFR Signaling. *PLoS One* **10**, e0139971  
716 (2015).
- 717 39. K. Oda, Y. Matsuoka, A. Funahashi, H. Kitano, A comprehensive pathway map of  
718 epidermal growth factor receptor signaling. *Mol. Syst. Biol.* **1**, 2005 0010 (2005).
- 719 40. S. Aifa *et al.*, Phosphorylation of Thr654 but not Thr669 within the juxtamembrane  
720 domain of the EGF receptor inhibits calmodulin binding. *Biochem. Biophys. Res.*  
721 *Commun.* **347**, 381-387 (2006).
- 722 41. K. Kojima, Y. Imamoto, R. Maeda, T. Yamashita, Y. Shichida, Rod visual pigment  
723 optimizes active state to achieve efficient G protein activation as compared with cone



- 724 visual pigments. *J. Biol. Chem.* **289**, 5061-5073 (2014).
- 725 42. M. Wadsater, S. Maric, J. B. Simonsen, K. Mortensen, M. Cardenas, The effect of using  
726 binary mixtures of zwitterionic and charged lipids on nanodisc formation and stability.  
727 *Soft Matter* **9**, 2329-2337 (2013).
- 728 43. M. Pirchi *et al.*, Single-molecule fluorescence spectroscopy maps the folding landscape  
729 of a large protein. *Nat Commun* **2**, 493 (2011).
- 730 44. R. Lamichhane *et al.*, Single-molecule view of basal activity and activation mechanisms  
731 of the G protein-coupled receptor  $\beta_2$ AR. *Proc. Natl. Acad. Sci. U. S. A.* **112**, 14254-  
732 14259 (2015).
- 733 45. R. Maeda *et al.*, Single-molecule observation of the ligand-induced population shift of  
734 rhodopsin, a G-protein-coupled receptor. *Biophys. J.* **106**, 915-924 (2014).
- 735 46. K. Okamoto, Y. Sako, Variational Bayes Analysis of a Photon-Based Hidden Markov  
736 Model for Single-Molecule FRET Trajectories. *Biophys. J.* **103**, 1315-1324 (2012).
- 737

738 **Figures**

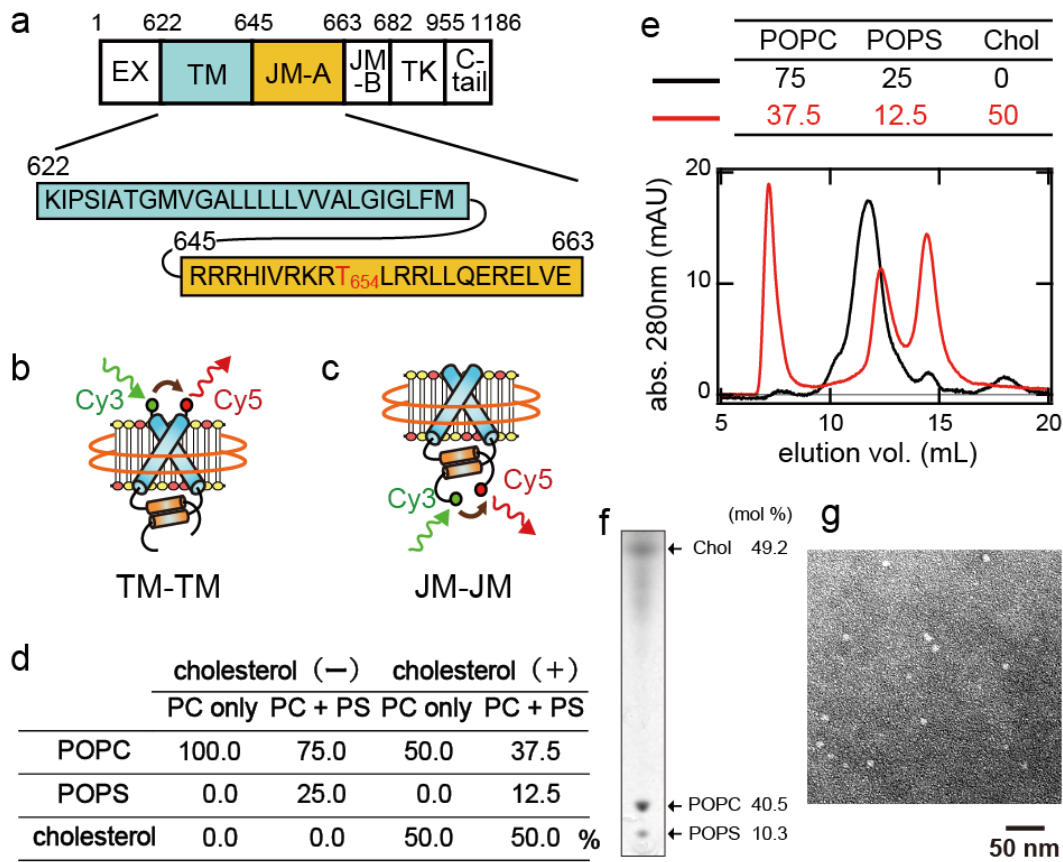

739

740 **Figure 1.** Construction of nanodiscs containing fluorescent TM-JM peptides of EGFR.  
 741 (a) Amino acid sequence of the EGFR TM and JM-A domains. EX, extracellular domain;  
 742 TK, tyrosine kinase domain. (b, c) Schematic images of nanodiscs containing dimeric  
 743 TM-JM peptides fluorescently labeled at the N- (b) and C-terminus (c), respectively. (d)  
 744 Lipid compositions used in the preparation of each nanodisc sample. The fractional ratios  
 745 of PS and cholesterol mimic those in the mammalian plasma membranes. (e) Size-  
 746 exclusion chromatography used for the purification of nanodiscs containing cholesterol  
 747 (red) or not (black). The charge ratios of PC/PS/cholesterol are described in the upper  
 748 table. The fraction having a peak absorbance of around 12 elution volumes (mL) was  
 749 collected and used for the subsequent experiments. (f) Thin-layer chromatography of the  
 750 nanodisc fraction containing cholesterol (fraction 12 in (e)). (g) A negative stain electron  
 751 micrograph of fraction 12 in (e). Size distribution of the nanodiscs calculated from the  
 752 images was fitted with a Gaussian function, with a mean diameter of  $11 \pm 2$  nm.

753

754

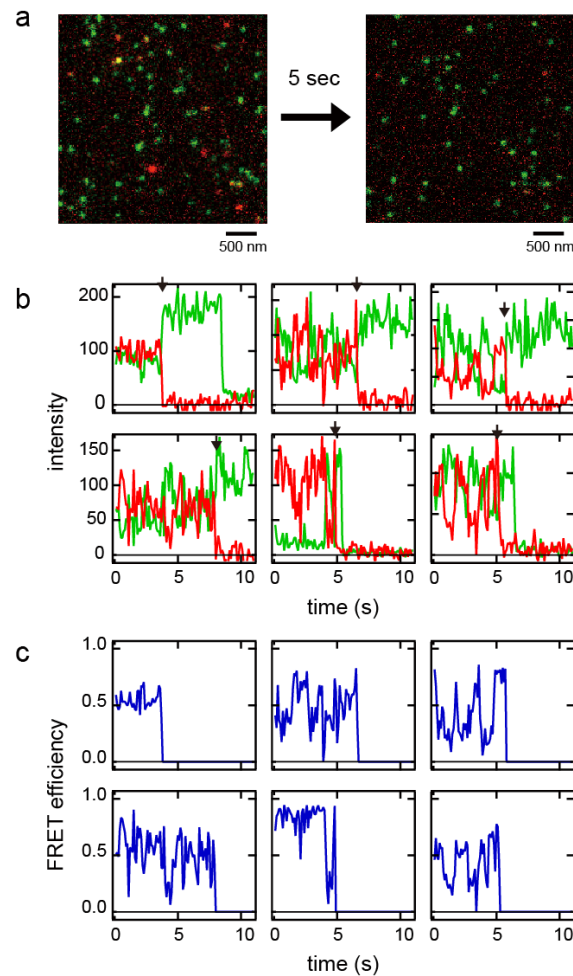

755

756 **Figure 2.** Single-pair FRET measurement of the EGFR TM-JM dimers in nanodiscs. (a)  
757 Fluorescence micrograph of nanodiscs illuminated with a green laser. Cy3 (green) and  
758 Cy5 (red) emissions were superimposed. The Cy5 emission was caused by FRET from  
759 Cy3. (b) Representative fluorescence trajectories of Cy3 (green) and Cy5 (red). Black  
760 arrows indicate photobleaching points of Cy5. (c) FRET efficiency trajectories of the  
761 fluorescence trajectories in (b). The FRET efficiency,  $E_{\text{FRET}}$ , was calculated as described  
762 in the Materials and Methods section. Typical fluorescence and FRET trajectories  
763 between peptides labeled at the C-terminus are shown. Transitions to low FRET  
764 efficiency states suggested that dissociation of the JM dimer occurred occasionally. The  
765 Förster radius  $R_0$  between Cy3 and Cy5 is 5.6 nm.

766

767

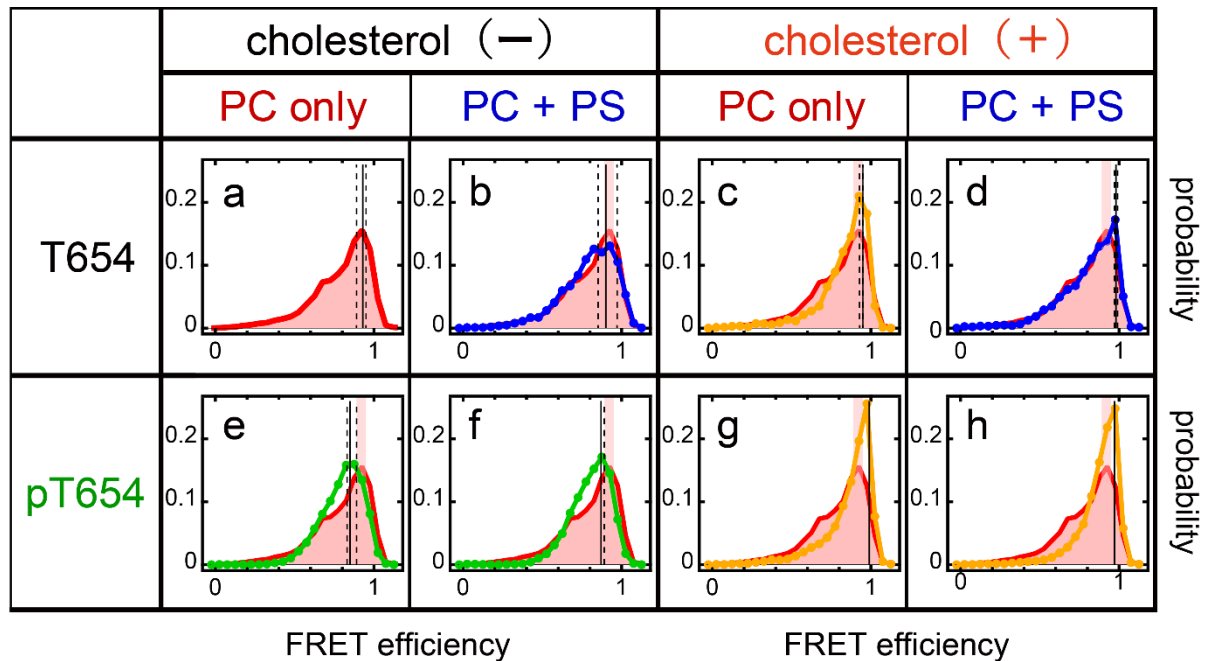

768

769 **Figure 3.** FRET efficiency ( $E_{\text{FRET}}$ ) distributions in nanodiscs containing a single  
770 Cy3/Cy5-pair of N-terminal labeled peptides. Nanodiscs contained non-phosphorylated  
771 (a–d) and Thr654 phosphorylated (e–h) peptides at the indicated lipid conditions.  
772 Positions of the mode and its 5-95% percentile section are indicated by solid and dashed  
773 lines, respectively. See Table I for these values. In (b–h), the distribution and the 95%  
774 percentile section shown in (a) are superimposed (red) for comparison.

775

776

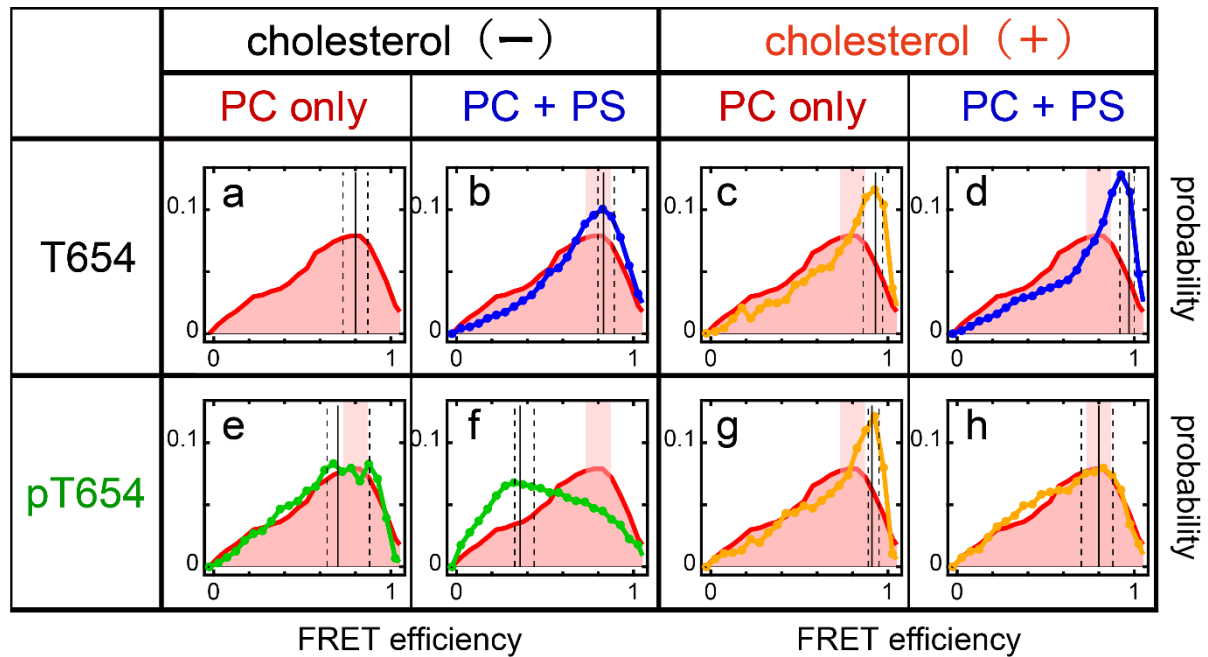

777

778 **Figure 4.**  $E_{\text{FRET}}$  distributions in nanodiscs containing a single Cy3/Cy5-pair of C-terminal  
 779 labeled peptides. Nanodiscs contained non-phosphorylated (a–d) and Thr654  
 780 phosphorylated (e–h) peptides in the indicated lipid conditions. Positions of the mode and  
 781 its 5-95% percentile section are indicated by solid and dashed lines, respectively. See  
 782 Table I for these values. In (b–h), the distribution and the 95% percentile section shown  
 783 in (a) are superimposed (red) for comparison.

784

785

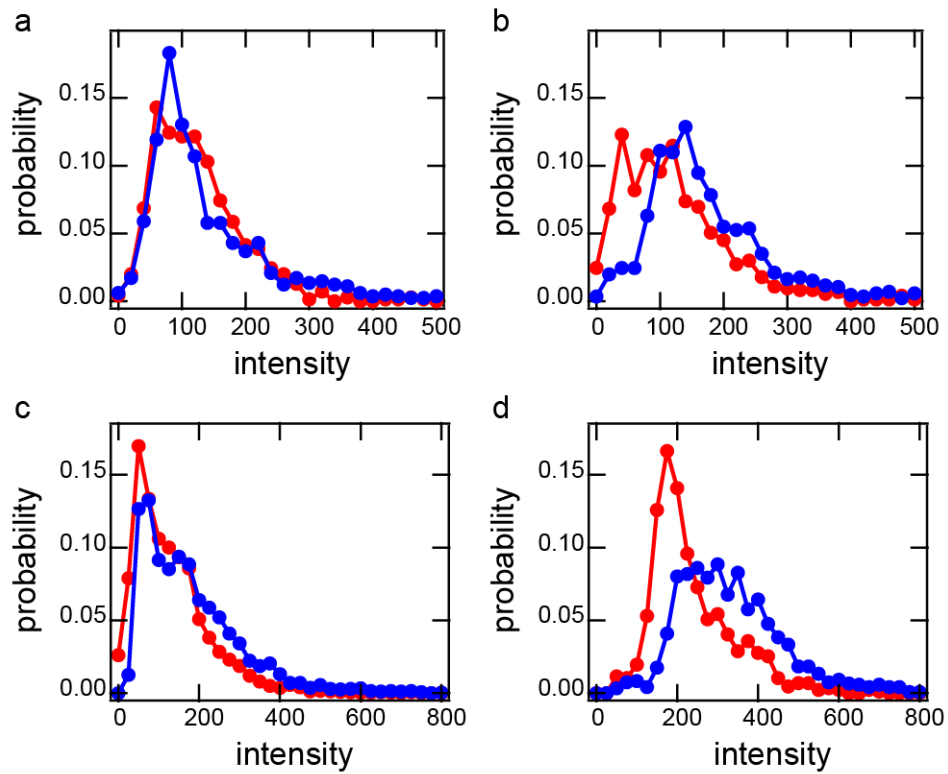

786

787 **Figure 5.** Higher-order oligomerization of EGFR TM-JM peptides in the nanodiscs.

788 Histograms are shown of the total fluorescence intensity of the peptides with Cy3-labeling

789 at the C-terminus in single nanodiscs containing cholesterol (blue) or not (red). Discs

790 containing no Cy5 peptide were chosen for measurement to avoid the possible effects of

791 FRET. Peptides with a non-phosphorylated (**a, c**) or phosphorylated (**b, d**) Thr654 were

792 reconstituted into nanodiscs in PC (**a, b**) or PC/PS (**c, d**) membranes.

793

794

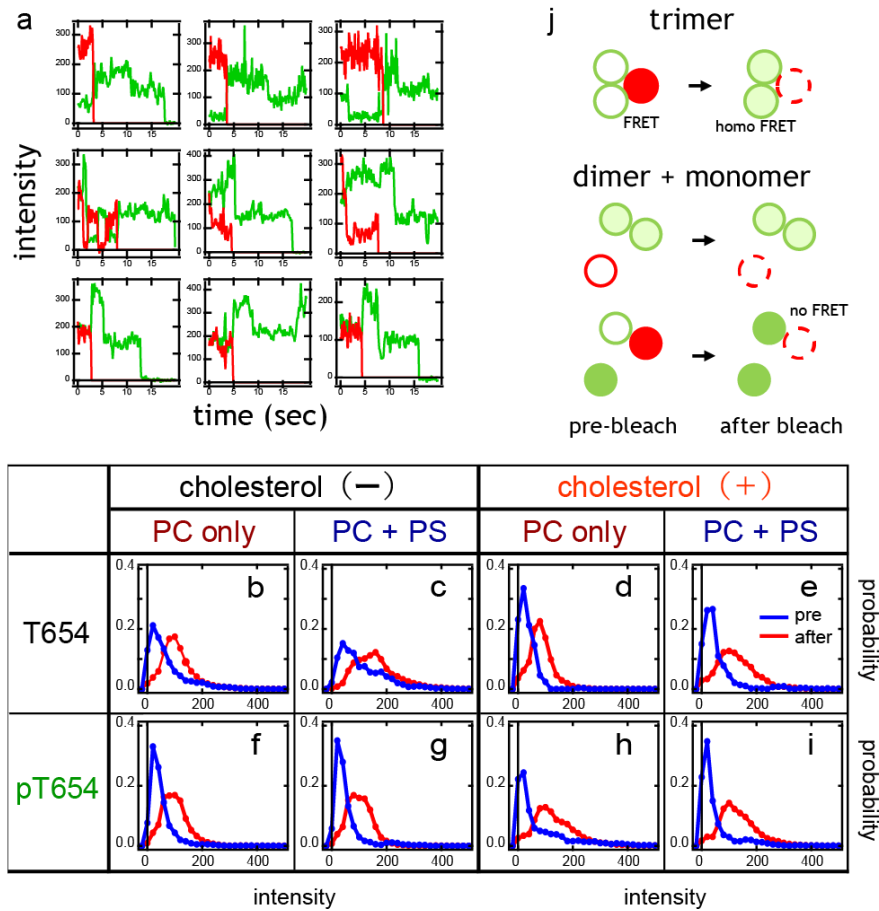

795

796 **Figure 6.** Assembly of EGFR TM regions. **(a)** Representative fluorescence trajectories of  
 797 Cy3 (green) and Cy5 (red) in nanodiscs containing two Cy3-labeled and one Cy5-labeled  
 798 peptide. Fluorescence intensities and/or two-step photobleaching dynamics after Cy5  
 799 photobleaching indicated that these nanodiscs contained two Cy3 peptides. **(b–i)**  
 800 Fluorescence intensity histograms of N-terminal-labeled Cy3 peptides before (blue) and  
 801 after (red) Cy5 photobleaching. Nanodiscs contained non-phosphorylated **(b–e)** and  
 802 Thr654 phosphorylated **(f–i)** peptides at the indicated lipid conditions. **(j)** Schematic  
 803 structures indicating proximity between three TM domains before (left) and after (right)  
 804 Cy5 photobleaching. Note that acceptance of the excitation energy from Cy3 was not  
 805 saturated for Cy5 under our experimental conditions, even in the presence of two Cy3  
 806 molecules.

807

808

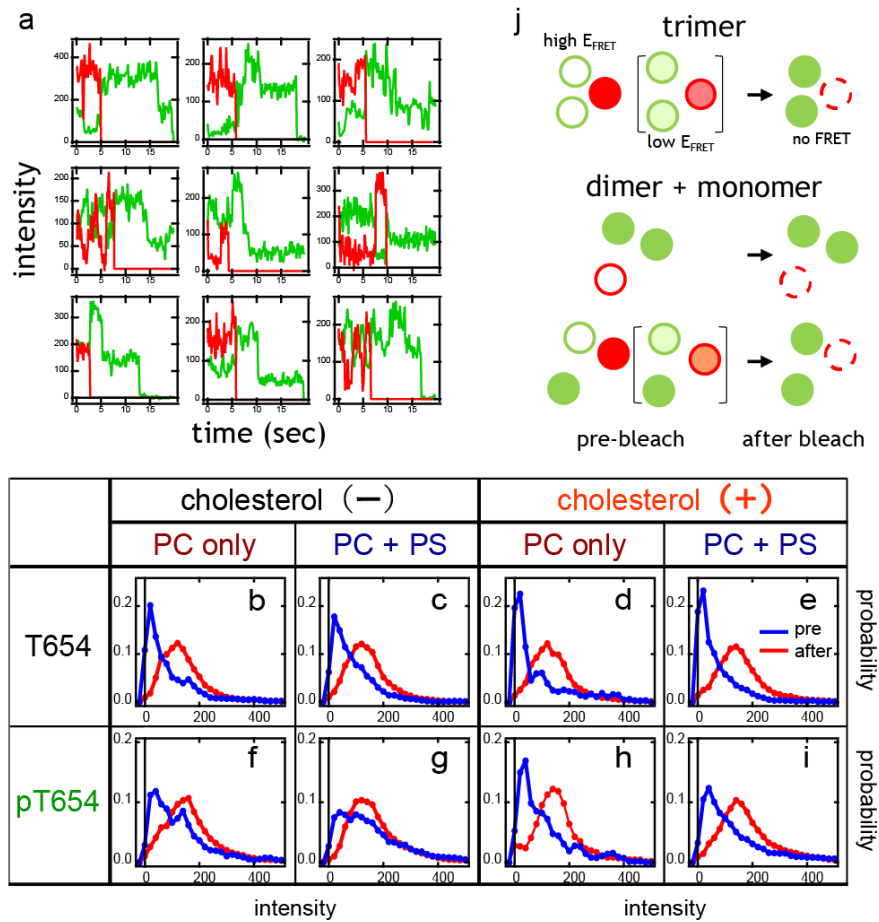

809

810 **Figure 7.** Assembly of EGFR JM regions. **(a)** Representative fluorescence trajectories of  
 811 Cy3 (green) and Cy5 (red) in nanodiscs containing two Cy3-labeled and one Cy5-labeled  
 812 peptide at the C-terminus. **(b–i)** Fluorescence intensity histograms of C-terminal-labeled  
 813 Cy3 peptides from nanodiscs containing two Cy3 and one Cy5 peptide before (blue) and  
 814 after (red) Cy5 photobleaching. Nanodiscs contained non-phosphorylated **(b–e)** and  
 815 Thr654 phosphorylated **(f–i)** peptides at the indicated lipid conditions. **(j)** Schematic  
 816 structures indicating proximity between three JM domains before (left and middle) and  
 817 after (right) Cy5 photobleaching.

818

819



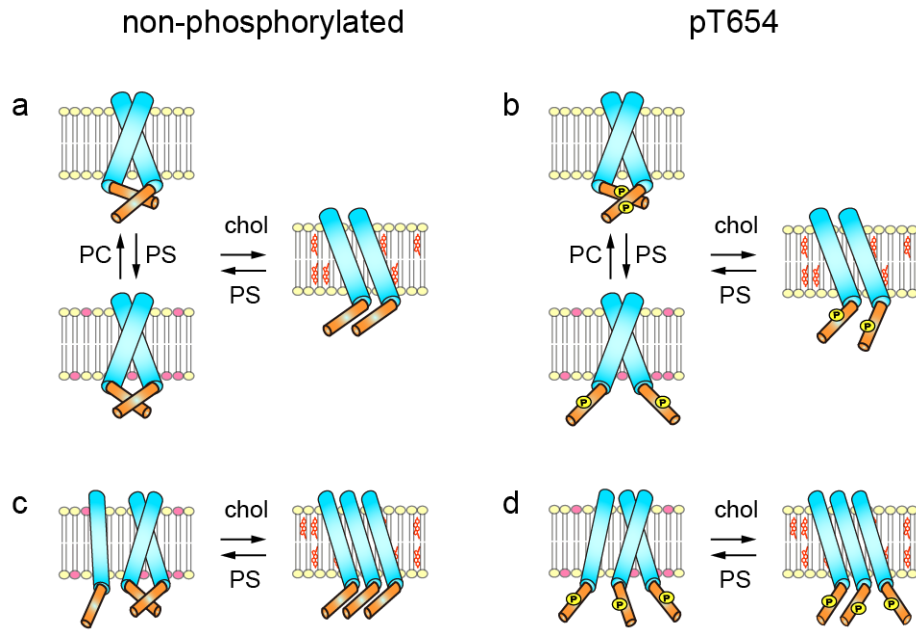

820

821 **Figure 8.** Possible configurations of EGFR TM-JM dimers and trimers regulated by  
822 membrane lipids and Thr654 phosphorylation.

823

824

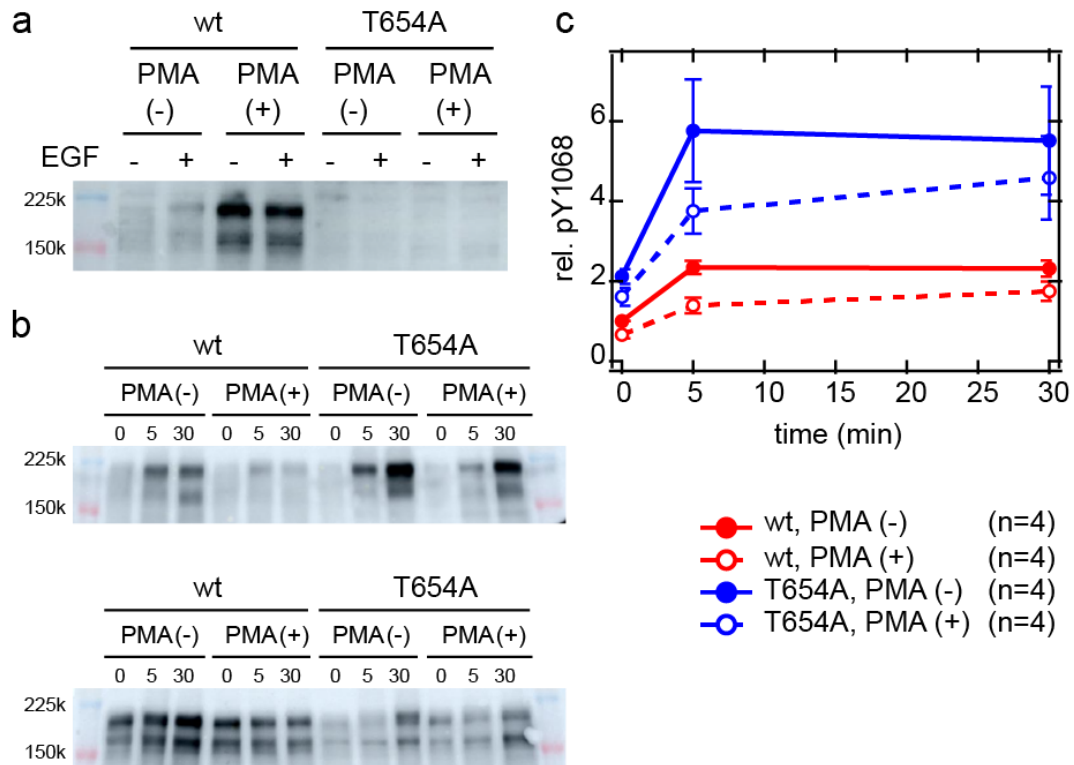

825

826 **Figure 9.** Thr and Tyr phosphorylation of EGFR. **(a)** Thr654 phosphorylation after EGF  
 827 stimulation and PMA pretreatment. **(b, c)** Timecourses of Y1068 phosphorylation for the  
 828 wt and T654A mutant of EGFR during EGF stimulation. Typical western blotting results  
 829 are indicated **(b, top)** and the average of four independent experiments are shown with  
 830 SE **(c)**. Phosphorylation levels were normalized to the expression levels of the whole  
 831 EGFR molecule **(b, bottom)**.

832

833

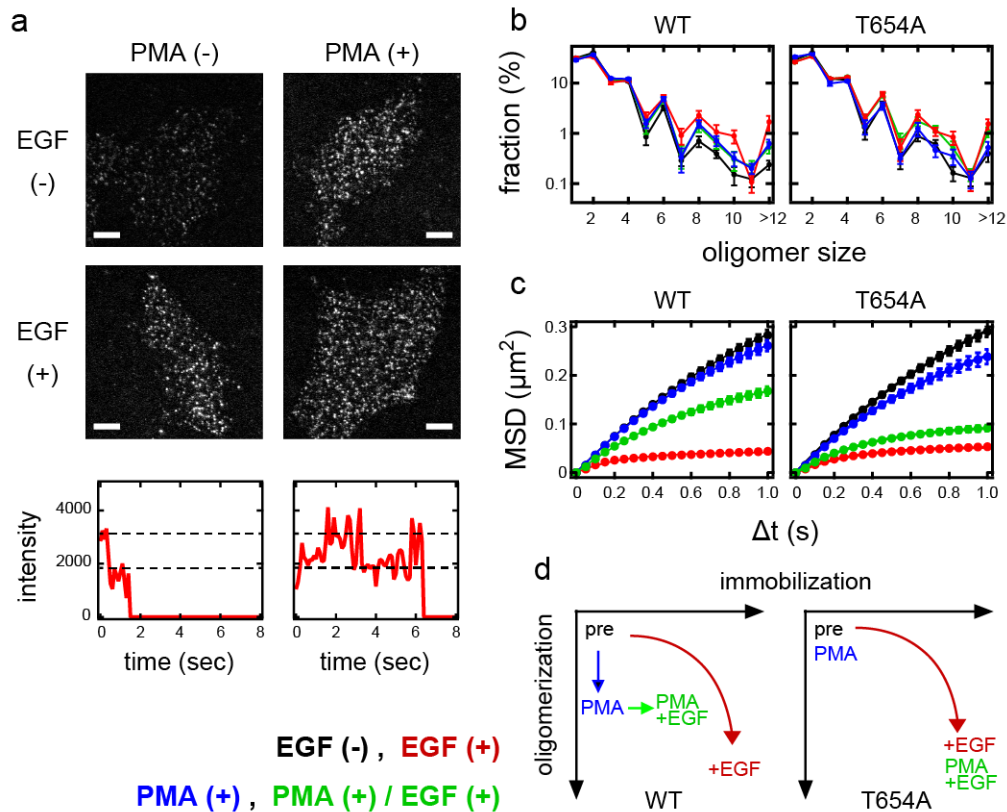

834

835 **Figure 10.** Oligomerization and lateral movements of EGFR on the living cell surface.  
 836 (a) Single molecule imaging of wt EGFR-GFP on the surface of living CHO-K1 cells  
 837 with (right) and without (left) PMA pretreatment. Cells were stimulated with (lower) and  
 838 without (upper) EGF. Bar, 5  $\mu\text{m}$ . Quantized transitions in the fluorescence intensities  
 839 (bottom) indicate single-molecule resolution of the imaging. (b) Oligomer size  
 840 distributions of wt (left) and T654A mutant (right) EGFR in cells. The oligomer size ratio  
 841 was measured before and 10 min after EGF stimulation. (c) Mean square displacement  
 842 (MSD) of wt (left) and T654A (right) EGFR spots as a function of the time interval,  
 843 indicating lateral mobility. The MSD was calculated before and 10 min after EGF  
 844 stimulation. In (b, c), cells were pretreated with (blue, green) or without (black, red) PMA  
 845 and stimulated (red, green) or not (black, blue) with EGF. (d) Diagram of the  
 846 oligomerization and immobilization states of wt (left) and T654A mutant (right) EGFR  
 847 suggested from single-molecule measurements. Arrows indicate the state transitions after  
 848 PMA treatment and EGF stimulation.

849

850

851

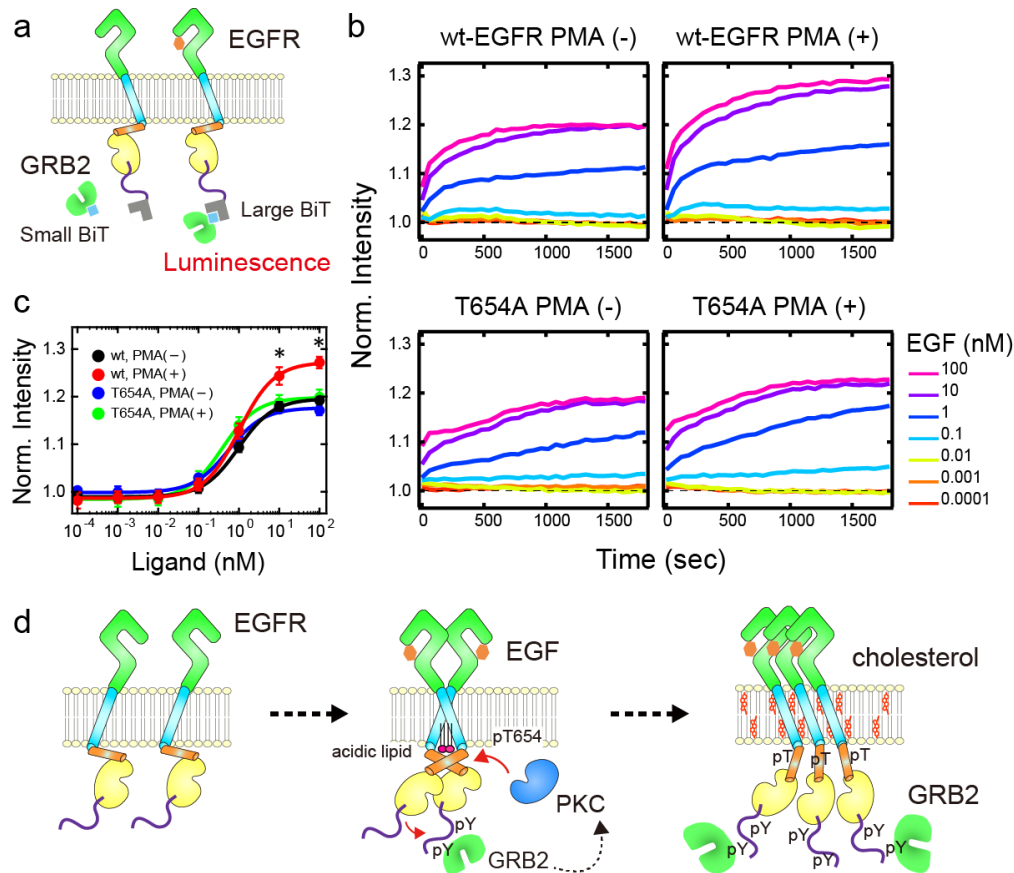

852

853 **Figure 11.** NanoBiT assay for the EGFR/GRB2 interaction in living cells. (a) Schematic  
 854 illustration of the NanoBiT assay of EGFR/GRB2 interactions. (b) Typical time courses  
 855 of chemiluminescence signals generated from the complex formation of large BiT  
 856 (LgBiT)-fused EGFR and small BiT (SmBiT)-fused GRB2 after EGF application at time  
 857 0. The final concentration of EGF in the culture medium was varied from 0.0001 to 100  
 858 nM. Measurements were done in cells with (+) or without (-) PMA pretreatment. (c) Dose  
 859 dependency of the chemiluminescence intensities at 30 min after EGF stimulation. The  
 860 average values from four independent experiments are shown with SE. Lines indicate  
 861 fitting with a Hill-equation function. \* $p < 0.05$  determined by  $t$ -test against the signal in  
 862 wt cells without PMA. (d) A schematic model of the activation and signal transduction  
 863 process for EGFR dimers and oligomers. In the oligomers of EGFR, affinity with GRB<sub>2</sub>  
 864 is increased.

865

866

867 **Table I. Peak values in the  $E_{FRET}$  distributions between the TM-JM peptides**

868

| lipid composition | pT654 | labelling |             |        |             |
|-------------------|-------|-----------|-------------|--------|-------------|
|                   |       | N-term    |             | C-term |             |
|                   |       | mean      | 95%         | mean   | 95%         |
| PC                | -     | 0.93      | (0.89-0.95) | 0.81   | (0.73-0.87) |
| PC/PS             | -     | 0.90      | (0.85-0.97) | 0.83   | (0.79-0.89) |
| PC/chol           | -     | 0.95      | (0.93-0.95) | 0.93   | (0.85-0.97) |
| PC/PS/chol        | -     | 0.98      | (0.97-0.99) | 0.94   | (0.91-0.97) |
| PC                | +     | 0.85      | (0.83-0.89) | 0.68   | (0.63-0.89) |
| PC/PS             | +     | 0.87      | (0.87-0.89) | 0.36   | (0.33-0.43) |
| PC/chol           | +     | 0.99      | (0.99)      | 0.90   | (0.89-0.95) |
| PC/PS/chol        | +     | 0.97      | (0.97)      | 0.82   | (0.81-0.89) |

869

870

871 Mean and their 95% percentile section of the peak values in Figs 3 and 4 were estimated  
872 by bootstrap method with 300-times of resampling. An increase of the resampling times  
873 to 1000 did not change the result.
